# Supplementary material for: Re-dispersion and film formation of GdVO4 : Ln3+ (Ln3+ = Dy3+, Eu3+, Sm3+, Tm3+) nanoparticles: particle size and luminescence studies
Source: Royal Society of Chemistry journal article supplement (doi:10.1039/c2dt12190e), 2012-01-01
Supplement: c2dt12190e.pdf [file c2dt12190e.pdf]

## Supplementary Information

**Re-dispersion and film formation of  $\text{GdVO}_4:\text{Ln}^{3+}$  ( $\text{Ln}^{3+} = \text{Dy}^{3+}, \text{Eu}^{3+}, \text{Sm}^{3+}, \text{Tm}^{3+}$ )**

**nanoparticles: particle size and luminescence studies**

N. Shanta Singh,<sup>1</sup> R. S. Ningthoujam,<sup>2,\*</sup> Ganngam Phaomei,<sup>3</sup> S. Dorendrajit Singh,<sup>1</sup> A. Vinu<sup>4</sup>

<sup>1</sup>*Department of Physics, Manipur University, Canchipur, Imphal-795003, Manipur, India*

<sup>2</sup>*Chemistry Division, Bhabha Atomic Research Centre, Mumbai-400085, India*

<sup>3</sup>*Department of Chemistry, Manipur University, Canchipur, Imphal-795003, Manipur, India*

<sup>4</sup>*National Institute for Materials Science 1-1, Namiki, Tsukuba, Japan*

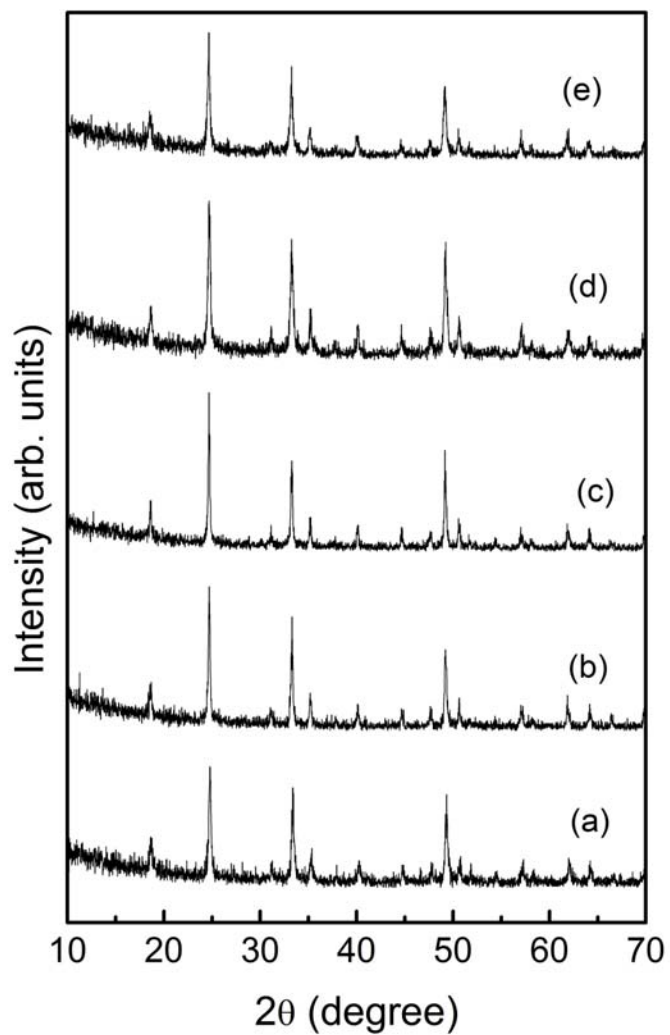

Figure S1 XRD patterns of as prepared GdVO<sub>4</sub> samples doped with (a) 1, (b) 5, (c) 7, (d) 10 and (e) 15 at.% Sm<sup>3+</sup>.

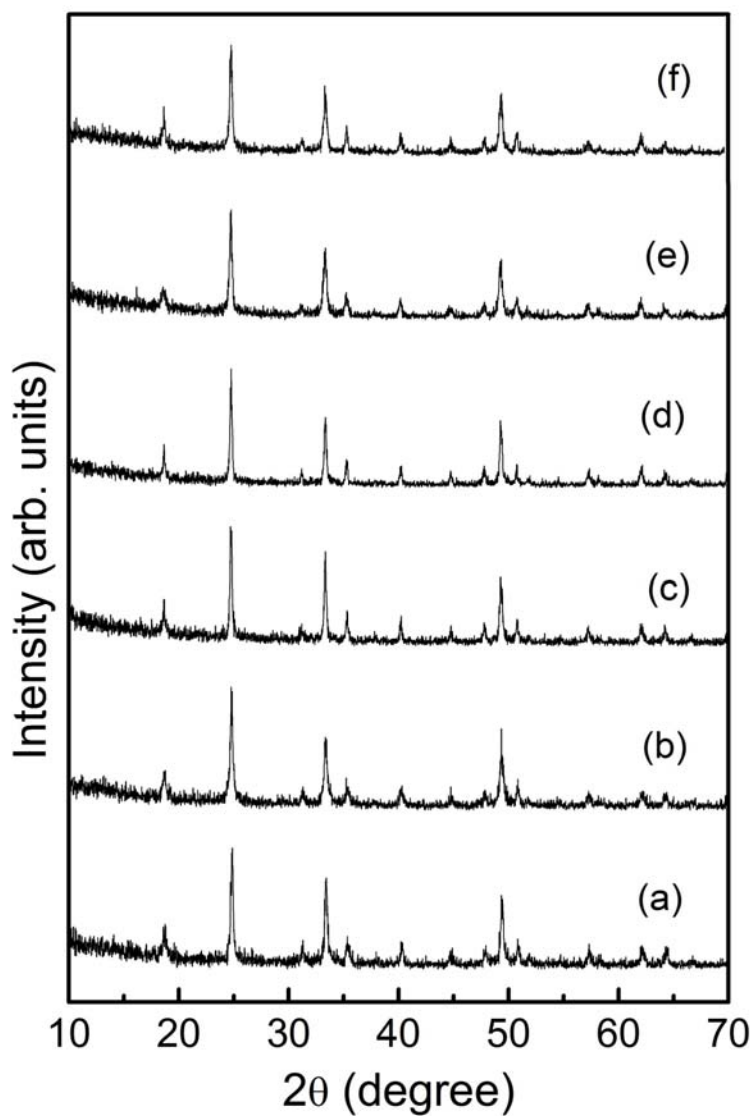

Figure S2 XRD patterns of 500 °C annealed GdVO<sub>4</sub> samples doped with (a) 1, (b) 3, (c) 5, (d) 7, (e) 10 and (f) 15 at.% Sm<sup>3+</sup>.

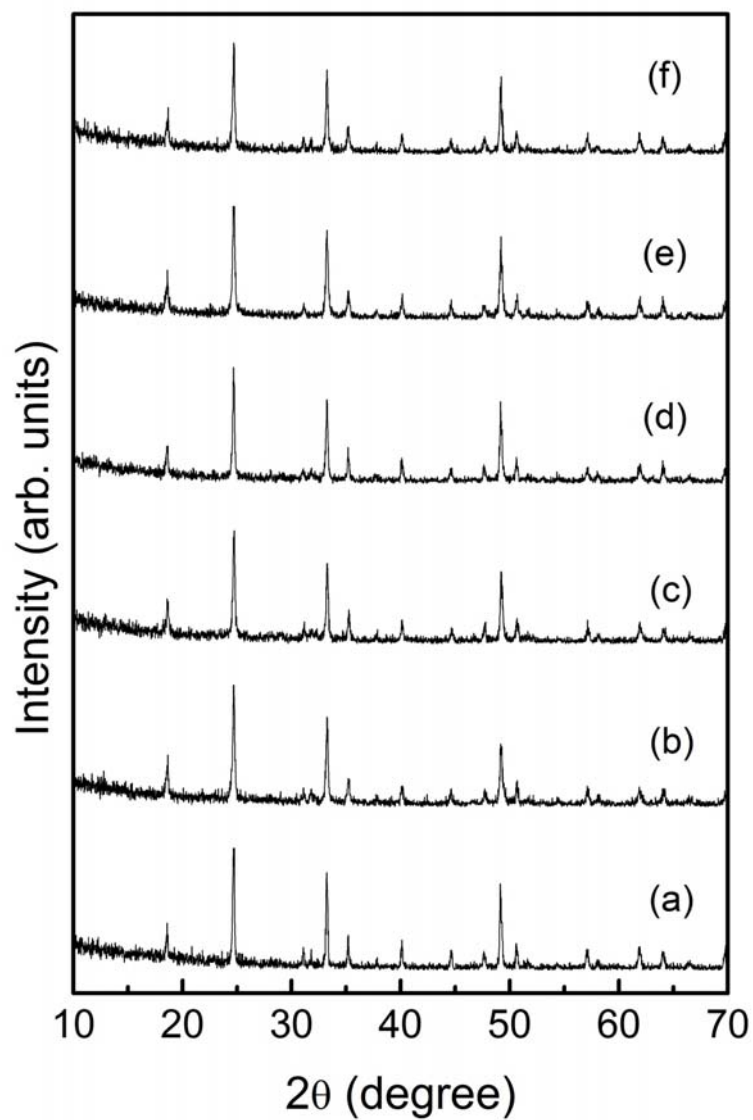

Figure S3 XRD patterns of 900 °C annealed GdVO<sub>4</sub> samples doped with (a) 1, (b) 3, (c) 5, (d) 7, (e) 10 and (f) 15 at.% Sm<sup>3+</sup>.

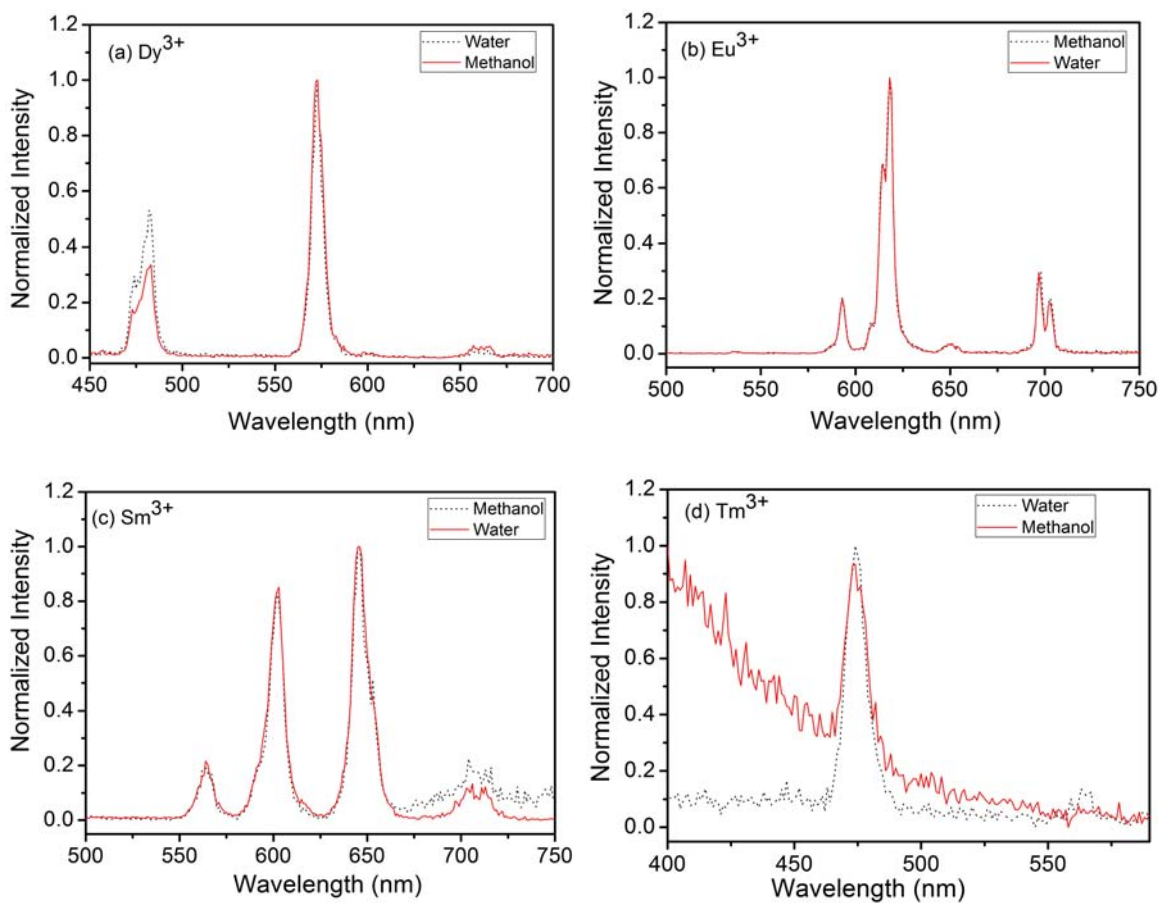

Figure S4 Normalized emission spectra of GdVO<sub>4</sub> doped with (a) Dy<sup>3+</sup>, (b) Eu<sup>3+</sup>, (c) Sm<sup>3+</sup> and (d) Tm<sup>3+</sup> after dispersion in methanol and water.

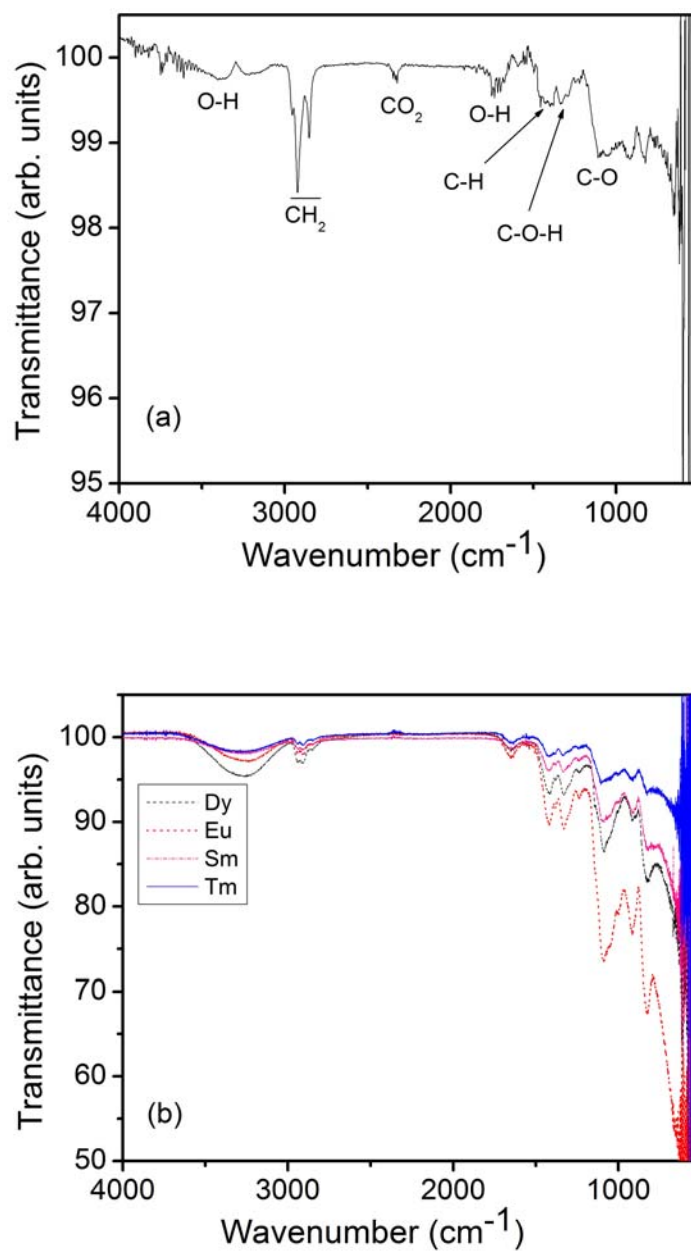

Figure S5 IR spectra of (a) PVA film and (b) PVA film dispersed with samples.

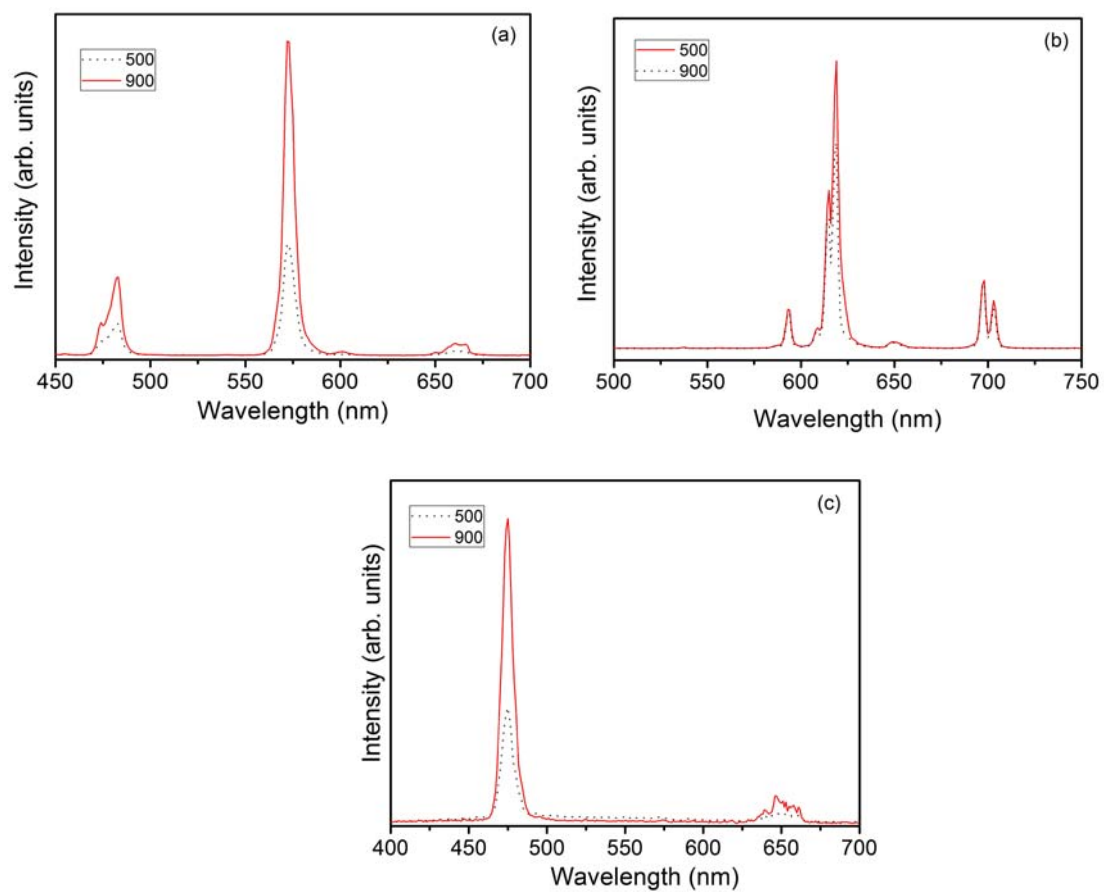

Figure S6 Emission spectra of 500 and 900 °C annealed GdVO<sub>4</sub> samples doped with (a) Dy<sup>3+</sup> (2 at.%), (b) Eu<sup>3+</sup> (5 at.%) and (c) Tm<sup>3+</sup> (2 at.%).
